# Supplementary material
Source: publisher figshare collection journal article supplement (https://acs.figshare.com/ndownloader/files/5120554)
Supplement: Supplementary file 1 [file 5120554]

# **An expedient total synthesis of (-)-dactylolide and formal synthesis of (-)-zampanolide**

**Fei Ding and Michael P. Jennings\***

*Department of Chemistry, University of Alabama, 500 Campus Dr.  
Tuscaloosa, AL 35487-0336*

*jenningsm@bama.ua.edu*

## **Supporting Information**

**General Procedure**  $^1\text{H}$  and  $^{13}\text{C}$  NMR spectra were collected on a 360 MHz or 500 MHz Bruker spectrometer. Chemical shifts were reported in parts per million relative to tetramethylsilane (TMS) using deuterated chloroform ( $\text{CDCl}_3$ ) as the internal reference, and coupling constants were reported in Hertz. Optical rotation measurements were performed on a Rudolph AUTOPOL IV polarimeter at Biocryst Pharmaceuticals, Inc. FTIR spectra were recorded on a BIO-RAD FTS-40 spectrometer. HRMS determination was performed in the laboratory of mass spectrometry at the University of Illinois, Urbana-Champaign. Solvents and reagents were used as purchased without further purification.

**5,6-Bis-(tert-butyl-dimethyl-silanyloxy)-hex-2-ynoic acid ethyl ester (6)** To a flame-dried flask under Ar, a BuLi solution (1.6 M in hexanes, 21 mL, 33.7 mmol) was added dropwise into a solution of the alkyne (7.37 g, 22.5 mmol) in THF (63 mL) at  $-78^\circ\text{C}$  and stirred for 15 min. Ethyl chloroformate (6.45 mL, 67.5 mmol) was then added, and the solution was warmed to rt and kept stirring for 45 min before quenched with a

saturated NaHCO<sub>3</sub> solution (60 mL). The aqueous solution was extracted with Et<sub>2</sub>O (3 X 60 mL). The combined organic solution was dried over Na<sub>2</sub>SO<sub>4</sub> and concentrated under reduced pressure. Flash chromatography (silica, 2% EtOAc in hexanes) afforded the alkynoate (*R*<sub>f</sub> = 0.40, 2% EtOAc in hexanes) as colorless oil (9.5 g, 100%). <sup>1</sup>H NMR (360 MHz, CDCl<sub>3</sub>) δ 4.21 (q, *J* = 7.2, 2H), 3.87 (m, 1H), 3.59 (dd, *J* = 10.2, 4.9, 1H), 3.48 (dd, *J* = 10.2, 6.9, 1H), 2.65 (dd, *J* = 17.0, 4.7, 1H), 2.43 (dd, *J* = 17.0, 6.6, 1H), 1.29 (t, *J* = 7.2, 3H), 0.89 (s, 18H), 0.12 (s, 3H), 0.08 (s, 3H), 0.06 (s, 6H). <sup>13</sup>C NMR (90 MHz, CDCl<sub>3</sub>) δ 154.9, 87.2, 74.8, 71.4, 66.7, 62.1, 35.2, 26.1, 25.0, 23.3, 18.3, 14.2, -4.3, -4.6, -5.1, -5.2. [α]<sub>D</sub><sup>20</sup> -6.4 (c 0.90, CH<sub>2</sub>Cl<sub>2</sub>). IR (CH<sub>2</sub>Cl<sub>2</sub>): 1710, 1471, 1115, 1082 cm<sup>-1</sup>. HRMS (ESI) calcd for C<sub>20</sub>H<sub>41</sub>O<sub>4</sub>Si<sub>2</sub> (M+H)<sup>+</sup>: 401.2543, found: 401.2528.

#### **5,6-Bis-(tert-butyl-dimethyl-silanyloxy)-3-methyl-hex-2-enoic acid ethyl ester (7)**

To a solution of NaOMe (61 mg, 1.1 mmol) in MeOH (54 mL), were added PhSH (2.86 mL, 28.0 mmol) and the alkynoate (9.0 g, 22.5 mmol). The solution was kept stirring for 20 h at rt, before filtered through a silica plug, which was then eluted with Et<sub>2</sub>O to bring down the yellow band. Evaporation of solvents yielded the crude product. Flash chromatography (silica, 10% EtOAc in hexanes) afforded the alkenoate (*R*<sub>f</sub> = 0.40, 10% EtOAc in hexanes) as pale yellow oil (10.35 g, 90%). <sup>1</sup>H NMR (360 MHz, CDCl<sub>3</sub>) δ 7.51 (m, 2H), 7.35 (m, 3H), 5.94 (s, 1H), 4.21 (m, 2H), 3.63 (m, 1H), 3.33 (dd, *J* = 10.0, 5.0, 1H), 3.15 (dd, *J* = 10.0, 5.6, 1H), 1.29 (t, *J* = 7.2, 3H), 0.82 (s, 9H), 0.79 (s, 9H), -0.01 (s, 3H), -0.04 (s, 3H), -0.09 (s, 6H). <sup>13</sup>C NMR (90 MHz, CDCl<sub>3</sub>) δ 166.1, 156.9, 135.6, 131.5, 129.4, 115.9, 71.8, 67.6, 60.1, 41.8, 18.3, 15.5, 14.3, -4.2, -4.6, -5.2, -5.3.

To a flame-dried flask under Ar, a MeMgBr solution (3.0 M in Et<sub>2</sub>O, 473 μL, 1.42 mmol) was added dropwise into a suspension of CuI (296 mg, 1.56 mmol) in THF

(4.7 mL) at  $-78^{\circ}\text{C}$ . The reaction mixture was warmed to rt and then cooled back to  $-78^{\circ}\text{C}$ , before a solution of the thioether (0.50g, 0.98 mmol) in THF (0.5 mL) was added. The solution was warmed to  $0^{\circ}\text{C}$  and kept stirring for 1 h. Water (0.5 mL) was then added, and the mixture was diluted with  $\text{Et}_2\text{O}$  (20 mL), dried over  $\text{Na}_2\text{SO}_4$ . The solution was filtered through a silica plug, which was then eluted with  $\text{Et}_2\text{O}$  (10 mL). The combined organics were concentrated under reduced pressure to afford the product ( $R_f = 0.55$ , 10% EtOAc in hexanes) as colorless oil without further purification (395 mg, 97%).  $^1\text{H}$  NMR (360 MHz,  $\text{CDCl}_3$ )  $\delta$  5.70 (s, 1H), 4.14 (m, 2H), 3.81 (m, 1H), 3.54 (dd,  $J = 9.9, 5.0$ , 1H), 3.37 (dd,  $J = 9.9, 6.8$ , 1H), 2.45 (dd,  $J = 12.7, 3.8$ , 1H), 2.18 (d,  $J = 1.4$ , 3H), 2.15 (dd,  $J = 12.7, 7.9$ , 1H), 1.26 (t,  $J = 7.0$ , 3H), 0.89 (s, 9H), 0.86 (s, 9H), 0.05 (s, 6H), 0.03 (s, 3H), 0.0 (s, 3H).  $^{13}\text{C}$  NMR (90 MHz,  $\text{CDCl}_3$ )  $\delta$  166.8, 156.9, 118.5, 71.8, 67.3, 59.6, 46.2, 26.2, 26.0, 25.7, 19.7, 18.5, 18.3, 15.5, 14.3, -4.2, -4.7, -5.1, -5.2.  $[\alpha]_D^{20}$  -7.7 (c 2.35,  $\text{CH}_2\text{Cl}_2$ ). IR ( $\text{CH}_2\text{Cl}_2$ ): 1713, 1653, 1474, 1226, 1154, 1094  $\text{cm}^{-1}$ . HRMS (ESI) calcd for  $\text{C}_{21}\text{H}_{45}\text{O}_4\text{Si}_2$  ( $\text{M}+\text{H}$ ) $^+$ : 417.2856, found: 417.2860.

**5,6-Bis-(tert-butyl-dimethyl-silanyloxy)-3-methyl-hex-2-enal (8)** To a flame-dried flask under Ar, a DIBAL-H solution (1.0 M in  $\text{CH}_2\text{Cl}_2$ , 2.2 mL, 2.2 mmol) was added dropwise into a solution of the ester (416 mg, 1.0 mmol) in  $\text{CH}_2\text{Cl}_2$  (7.8 mL) at  $-78^{\circ}\text{C}$  and stirred for 2 h. The solution was then poured directly into a stirring mixture of a saturated sodium potassium tartrate aqueous solution (3 mL) and hexanes (17 mL). The aqueous layer was extracted with  $\text{Et}_2\text{O}$  (10 mL), and the combined organics were filtered through a celite plug. Evaporation of solvents afforded the alcohol ( $R_f = 0.20$ , 20% EtOAc in hexanes) as colorless oil without further purification (354 mg, 95%).  $^1\text{H}$  NMR (360 MHz,  $\text{CDCl}_3$ )  $\delta$  5.45 (t,  $J = 7.1$ , 1H), 4.15 (m, 2H), 3.77 (m, 1H), 3.51 (dd,  $J = 9.9$ ,

5.4, 1H), 3.39 (dd, J = 9.9, 6.3, 1H), 2.31 (dd, J = 13.3, 4.2, 1H), 2.06 (dd, J = 13.3, 7.5, 1H), 1.70 (s, 3H), 0.89 (s, 9H), 0.86 (s, 9H), 0.04 (s, 9H), 0.02 (s, 3H). <sup>13</sup>C NMR (90 MHz, CDCl<sub>3</sub>) δ 136.8, 126.6, 72.1, 67.5, 59.7, 44.9, 26.2, 26.1, 25.9, 23.6, 18.6, 17.2, -4.1, -4.6, -5.06, -5.13. [α]<sub>D</sub><sup>20</sup> -4.4 (c 0.90, CH<sub>2</sub>Cl<sub>2</sub>). IR (CH<sub>2</sub>Cl<sub>2</sub>): 1473, 1226, 1154, 1094 cm<sup>-1</sup>. HRMS (ESI) calcd for C<sub>19</sub>H<sub>43</sub>O<sub>3</sub>Si<sub>2</sub> (M+H)<sup>+</sup>: 375.2751, found: 375.2756.

To a solution of the allylic alcohol (151 mg, 0.404 mmol) and NaOAc (27 mg, 0.324 mmol) in CH<sub>2</sub>Cl<sub>2</sub> (2 mL), was added PCC (174 mg, 0.808 mmol). The reaction mixture was stirred for 1 h at rt, before diluted with Et<sub>2</sub>O (10 mL) and then filtered through a silica plug. The plug was washed with Et<sub>2</sub>O (4 mL). Evaporation of solvents afforded the enal (R<sub>f</sub> = 0.50, 20% EtOAc in hexanes) as yellowish oil (141 mg, 94%, 6:1 Z:E). <sup>1</sup>H NMR (360 MHz, CDCl<sub>3</sub>) δ 9.99 (d, J = 8.0, 1H), 5.92 (d, J = 8.0, 1H), 3.86 (m, 1H), 3.56 (dd, J = 9.8, 4.7, 1H), 3.37 (dd, J = 9.8, 7.2, 1H), 2.53 (dd, J = 13.3, 4.5, 1H), 2.21 (s, 3H), 0.89 (s, 9H), 0.86 (s, 9H), 0.051 (s, 6H), 0.045 (s, 3H), 0.01 (s, 3H). <sup>13</sup>C NMR (90 MHz, CDCl<sub>3</sub>) δ 191.4, 161.6, 130.2, 72.0, 67.1, 46.0, 26.1, 14.3, -4.2, -4.6, -5.13, -5.15. [α]<sub>D</sub><sup>20</sup> -2.4 (c 1.83, CH<sub>2</sub>Cl<sub>2</sub>). IR (CH<sub>2</sub>Cl<sub>2</sub>): 1672, 1469, 1108 cm<sup>-1</sup>. HRMS (ESI) calcd for C<sub>19</sub>H<sub>41</sub>O<sub>3</sub>Si<sub>2</sub> (M+H)<sup>+</sup>: 373.2594, found: 373.2589.

**8,9-Bis-(tert-butyl-dimethylsilanyloxy)-6-methyl-nona-1,5-dien-4-ol (9)** To a flame-dried flask under Ar, allylmagnesium bromide (1.0 M solution in ether, 29.0 mL) was added dropwise into a solution of (-)-Ipc<sub>2</sub>BOMe (10.0 g, 31.9 mmol) in anhydrous ether (32 mL) at 0°C. The reaction mixture was stirred at rt for 1 h before cooled to -78°C. The aldehyde (7.18 g, 19.3 mmol) was added dropwise into the borane solution and allowed to stir for 1 h and then warm slowly to rt during 1 h. An aqueous solution of NaOH (3 M, 12.8 mL) was added, followed by slow addition of a 30% H<sub>2</sub>O<sub>2</sub> solution

(25.5 mL). The mixture was refluxed for 3 h. After cooled to rt, the biphasic solution was separated, and the aqueous layer was extracted with ether (3 X 50 mL). The combined organics were dried over Na<sub>2</sub>SO<sub>4</sub>, and rotavapped to yield the crude product. Flash chromatography (silica, 10% EtOAc in hexanes) afforded the homoallylic alcohol ( $R_f$  = 0.50, 20% EtOAc in hexanes) as colorless oil (5.70 g, 71%) along with other isomers (two diastereomers for each of the Z/E isomers, combined yield: 88%, de: 90%). <sup>1</sup>H NMR (360 MHz, CDCl<sub>3</sub>)  $\delta$  5.81 (m, 1H), 5.25 (dd,  $J$  = 8.5, 1.0, 1H), 5.12 (m, 2H), 4.41 (dd,  $J$  = 14.6, 6.3, 1H), 3.77 (ddd,  $J$  = 12.2, 11.2, 5.6, 1H), 3.49 (dd,  $J$  = 10.0, 4.5, 1H), 3.41 (dd,  $J$  = 10.0, 4.4, 1H), 2.31 (dd,  $J$  = 11.4, 6.5, 1H), 2.28 (m, 2H), 2.05 (dd,  $J$  = 11.4, 6.7, 1H), 1.72 (d,  $J$  = 1.2, 3H), 0.90 (s, 9H), 0.88 (s, 9H), 0.055 (s, 3H), 0.047 (s, 6H), 0.045 (s, 3H). <sup>13</sup>C NMR (90 MHz, CDCl<sub>3</sub>)  $\delta$  136.1, 134.7, 130.2, 118.0, 72.3, 68.0, 67.2, 44.9, 42.3, 26.2, 26.1, 18.6, 18.4, 17.6, -4.05, -4.50, -5.05, -5.11.  $[\alpha]_D^{20}$  -10 (c 1.3, CH<sub>2</sub>Cl<sub>2</sub>). IR (CH<sub>2</sub>Cl<sub>2</sub>): 1471, 1120, 1092 cm<sup>-1</sup>. HRMS (ESI) calcd for C<sub>22</sub>H<sub>46</sub>O<sub>3</sub>Si<sub>2</sub>Na (M+Na)<sup>+</sup>: 437.2883, found: 437.2885.

**6-[4,5-Bis-(tert-butyl-dimethyl-silanyloxy)-2-methyl-pent-1-enyl]-5,6-dihydro-**

**pyran-2-one (11)** To a flame-dried flask under Ar, acryloyl chloride (2.23 mL, 27.6 mmol) was added dropwise into a solution of the alcohol (5.70 g, 13.8 mmol), Et<sub>3</sub>N (4.29 mL, 30.4 mmol), and DMAP (84 mg, 0.70 mmol) in CH<sub>2</sub>Cl<sub>2</sub> (138 mL) at rt. The solution was stirred for 16 h, before brine (100 mL) was added. The aqueous layer was extracted with CH<sub>2</sub>Cl<sub>2</sub> (2 X 50 mL), and the combined organics were washed with brine (50 mL) and then dried over Na<sub>2</sub>SO<sub>4</sub>. The solvents were removed under reduced pressure. Flash chromatography (silica, 2% EtOAc in hexanes) afforded the acrylate ( $R_f$  = 0.40, 10% EtOAc in hexanes) as colorless oil (5.12 g, 79%). <sup>1</sup>H NMR (360 MHz, CDCl<sub>3</sub>)  $\delta$  6.37 (dd,

$J = 17.2, 1.3, 1\text{H}$ ), 6.07 (dd,  $J = 17.2, 10.0, 1\text{H}$ ), 5.78 (dd,  $J = 10.0, 1.3, 1\text{H}$ ), 5.68 (m, 2H), 5.24 (dd,  $J = 9.3, 1.2, 1\text{H}$ ), 5.06 (m, 2H), 3.75 (ddd,  $J = 12.5, 11.6, 5.6, 1\text{H}$ ), 3.48 (dd,  $J = 10.0, 5.4, 1\text{H}$ ), 3.38 (dd,  $J = 10.0, 6.1, 1\text{H}$ ), 2.40 (m, 2H), 2.31 (dd,  $J = 13.9, 6.0, 1\text{H}$ ), 2.06 (dd,  $J = 13.9, 6.5, 1\text{H}$ ), 1.75 (d,  $J = 1.1, 3\text{H}$ ), 0.89 (s, 9H), 0.85 (s, 9H), 0.04 (s, 6H), 0.03 (s, 3H), 0.0 (s, 3H).  $^{13}\text{C}$  NMR (90 MHz,  $\text{CDCl}_3$ )  $\delta$  165.7, 138.3, 133.7, 130.8, 129.5, 125.7, 118.2, 71.8, 70.7, 67.3, 45.0, 39.6, 26.2, 26.1, 18.6, 18.3, 17.7, -4.2, -4.6, -5.08, -5.13.  $[\alpha]_{\text{D}}^{20}$  -8.2 (c 0.17,  $\text{CH}_2\text{Cl}_2$ ). IR ( $\text{CH}_2\text{Cl}_2$ ): 1715, 1409, 1201  $\text{cm}^{-1}$ . HRMS (ESI) calcd for  $\text{C}_{25}\text{H}_{48}\text{O}_4\text{Si}_2\text{Na}$  ( $\text{M}+\text{Na}$ ) $^{+}$ : 491.2989, found: 491.2995.

To a flame-dried flask under Ar, Grubbs' second generation catalyst (208 mg, 0.245 mmol) was added into a solution of the acrylate (2.29 g, 4.90 mmol) in  $\text{CH}_2\text{Cl}_2$  (300 mL). The solution was heated under refluxing for 16 h, and then the solvent was removed under reduced pressure. Flash chromatography (silica, 20% EtOAc in hexanes) afforded the lactenone ( $R_f = 0.28$ , 20% EtOAc in hexanes) as colorless oil (2.06 g, 96%).  $^1\text{H}$  NMR (360 MHz,  $\text{CDCl}_3$ )  $\delta$  6.87 (dddd,  $J = 13.2, 8.5, 3.6, 1.4, 1\text{H}$ ), 6.03 (ddd,  $J = 13.2, 1.7, 1.7, 1\text{H}$ ), 5.40 (dd,  $J = 8.4, 0.9, 1\text{H}$ ), 5.15 (m, 1H), 3.77 (ddd,  $J = 11.6, 5.2, 1.4, 1\text{H}$ ), 3.51 (dd,  $J = 10.0, 5.1, 1\text{H}$ ), 3.39 (dd,  $J = 10.0, 6.5, 1\text{H}$ ), 2.37 (m, 3H), 2.08 (dd,  $J = 13.5, 7.0, 1\text{H}$ ), 1.76 (d,  $J = 1.4, 1\text{H}$ ), 0.89 (s, 9H), 0.88 (s, 9H), 0.05 (s, 12H).  $^{13}\text{C}$  NMR (90 MHz,  $\text{CDCl}_3$ )  $\delta$  164.6, 144.9, 140.6, 124.9, 122.0, 75.0, 72.4, 67.1, 44.6, 29.9, 26.2, 26.1, 18.5, 18.3, 18.1, -4.2, -4.5, -5.09, -5.12.  $[\alpha]_{\text{D}}^{20}$  -12 (c 0.17,  $\text{CH}_2\text{Cl}_2$ ). IR ( $\text{CH}_2\text{Cl}_2$ ): 1719, 1424  $\text{cm}^{-1}$ . HRMS (ESI) calcd for  $\text{C}_{23}\text{H}_{45}\text{O}_4\text{Si}_2$  ( $\text{M}+\text{H}$ ) $^{+}$ : 441.2856, found: 441.2860.

**6-[4,5-Bis-(tert-butyl-dimethyl-silanyloxy)-2-methyl-pent-1-enyl]-4-hydroxy-tetrahydro-pyran-2-one (12)**

To a solution of the lactenone (0.600 g, 1.36 mmol) in MeOH (6.8 mL), was added an aqueous  $\text{H}_2\text{O}_2$  solution (30%, 488 mg, 4.58 mmol).

The solution was cooled to 0°C, and an aqueous NaOH solution (6.0 M, 0.14 mL, 0.82 mmol) was added dropwise and stirred for 10 min. The reaction mixture was then warmed to rt and kept stirring for 0.5 h, before diluted with Et<sub>2</sub>O (15 mL) and H<sub>2</sub>O (15 mL). Concentrated aqueous HCl solution was added to adjust the pH to 4. The aqueous layer was extracted with Et<sub>2</sub>O (2 X 15 mL), and the combined organics were washed with brine (10 mL). After dried over Na<sub>2</sub>SO<sub>4</sub>, the organic solution was concentrated under reduced pressure. The residue was re-dissolved in PhH (3.4 mL), and the resultant solution was refluxed for 15 min using a Dean-Stark apparatus to remove water. After evaporation of PhH, flash chromatography (silica, 20% EtOAc in hexanes) afforded the epoxide (*R*<sub>f</sub> = 0.32, 20% EtOAc in hexanes) as colorless viscous oil (515 mg, 83%). <sup>1</sup>H NMR (360 MHz, CDCl<sub>3</sub>) δ 5.22 (ddd, *J* = 18.7, 8.8, 3.0, 1H), 5.21 (d, *J* = 1.5, 1H), 3.75 (ddd, *J* = 11.8, 5.0, 1.8, 1H), 3.66 (dd, *J* = 6.8, 3.9, 1H), 3.58 (d, *J* = 4.1, 1H), 3.50 (dd, *J* = 10.0, 5.1, 1H), 3.37 (dd, *J* = 10.0, 6.6, 1H), 2.33 (m, 2H), 2.05 (m, 2H), 1.73 (d, *J* = 0.7, 3H), 0.89 (s, 9H), 0.87 (s, 9H), 0.044 (s, 3H), 0.040 (s, 6H), 0.035 (s, 3H). <sup>13</sup>C NMR (90 MHz, CDCl<sub>3</sub>) δ 167.9, 140.5, 123.8, 72.2, 70.7, 67.1, 52.3, 49.3, 44.4, 30.1, 26.2, 26.1, 18.6, 18.3, 18.0, -4.2, -4.5, -5.08, -5.10, -5.12. [*α*]<sub>D</sub><sup>20</sup> +34 (c 0.37, CH<sub>2</sub>Cl<sub>2</sub>). IR (CH<sub>2</sub>Cl<sub>2</sub>): 1738, 1473, 1363, 1112, 1080, 1013 cm<sup>-1</sup>. HRMS (ESI) calcd for C<sub>23</sub>H<sub>45</sub>O<sub>5</sub>Si<sub>2</sub> (M+H)<sup>+</sup>: 457.2806, found: 457.2805.

To a solution of (PhSe)<sub>2</sub> (482 mg, 1.55 mmol) in EtOH (8.2 mL) under Ar at rt, was added NaBH<sub>4</sub> (118 mg, 3.09 mmol) and stirred for 5 min before cooled to 0°C. HOAc (176 μL, 3.09 mmol) was then added dropwise, and the solution was kept stirring for 5 min before a solution of the epoxide (471 mg, 1.03 mmol) in EtOH (6.2 mL) was added. The reaction mixture was stirred for 15 min, and then diluted with EtOAc (36 mL).

The organic solution was washed with half-saturated NaCl solution (9 mL). The aqueous solution was then extracted with EtOAc (2 X 9 mL) and the combined organic solution was dried over Na<sub>2</sub>SO<sub>4</sub> and concentrated under reduced pressure. Flash chromatography (silica, 1:1 EtOAc:hexanes) afforded the alcohol (*R*<sub>f</sub> = 0.30, 1:1 EtOAc:hexanes) as pale yellow oil (368 mg, 78%). <sup>1</sup>H NMR (360 MHz, CDCl<sub>3</sub>) δ 5.42 (ddd, *J* = 8.8, 8.8, 3.4, 1H), 5.28 (d, *J* = 8.6, 1H), 4.37 (ddd, *J* = 7.6, 3.9, 3.9, 1H), 3.76 (ddd, *J* = 11.6, 5.5, 5.5, 1H), 3.50 (dd, *J* = 10.1, 5.5, 1H), 3.38 (dd, *J* = 10.1, 6.4, 1H), 2.71 (dd, *J* = 17.7, 4.9, 1H), 2.61 (ddd, *J* = 17.7, 3.4, 1.3, 1H), 2.34 (dd, *J* = 13.4, 4.9, 1H), 2.07 (dd, *J* = 13.4, 7.0, 1H), 1.93 (ddd, *J* = 14.2, 3.9, 3.9, 1H), 1.82 (dd, *J* = 14.2, 3.4, 1H), 1.76 (s, 3H), 0.88 (s, 9H), 0.86 (s, 9H), 0.04 (s, 12H). <sup>13</sup>C NMR (90 MHz, CDCl<sub>3</sub>) δ 170.7, 139.6, 125.3, 73.0, 72.2, 67.1, 63.0, 44.5, 38.9, 36.3, 26.2, 26.1, 18.5, 18.3, 17.9, -4.21, -4.50, -5.10, -5.12. [α]<sub>D</sub><sup>20</sup> -6.4 (c 0.90, CH<sub>2</sub>Cl<sub>2</sub>). [α]<sub>D</sub><sup>20</sup> +14 (c 0.20, CH<sub>2</sub>Cl<sub>2</sub>). IR (CH<sub>2</sub>Cl<sub>2</sub>): 1728, 1424 cm<sup>-1</sup>. HRMS (ESI) calcd for C<sub>23</sub>H<sub>47</sub>O<sub>5</sub>Si<sub>2</sub> (M+H)<sup>+</sup>: 459.2962, found: 459.2960.

**2-Allyl-6-[4,5-bis-(tert-butyl-dimethyl-silanyloxy)-2-methyl-pent-1-enyl]-4-**

**triethylsilanyloxy-tetrahydro-pyran (13)**

To a flame-dried flask under Ar, an allylMgBr solution (1.0 M in Et<sub>2</sub>O, 0.37 mL, 0.37 mmol) was added dropwise into a solution of the lactone (57 mg, 0.12 mmol) in Et<sub>2</sub>O (1.2 mL) at -78°C. The suspension was stirred for 0.5 h, before quenched with H<sub>2</sub>O (1.2 mL) and then diluted with EtOAc (25 mL). The mixture was dried over Na<sub>2</sub>SO<sub>4</sub>, and the solvents were removed under reduced pressure to afford the hemi-ketal (*R*<sub>f</sub> = 0.60, 1:1 EtOAc:hexanes) as colorless oil (53 mg). This material was used without further purification. To a solution of the hemi-ketal (53 mg, 0.11 mmol) in CH<sub>2</sub>Cl<sub>2</sub> (1.1 mL) a flame-dried flask under Ar at -78°C, were added Et<sub>3</sub>SiH (0.18 mL, 1.1 mmol) in one portion and TFA (41 μL, 0.55 mmol)



sequentially. The solution was then warmed to  $-40^{\circ}\text{C}$  and kept stirring for 0.5 h, before quenched with a saturated  $\text{NaHCO}_3$  solution (1.1 mL). The mixture was diluted with  $\text{Et}_2\text{O}$  (25 mL) and dried over  $\text{Na}_2\text{SO}_4$ . The solvents were then removed under reduced pressure. Flash chromatography (silica, 5%  $\text{EtOAc}$  in hexanes) afforded the tetrahydropyran ( $R_f = 0.50$ , 10%  $\text{EtOAc}$  in hexanes) as pale yellow oil (55 mg, 76%).  $^1\text{H}$  NMR (360 MHz,  $\text{CDCl}_3$ )  $\delta$  5.84 (m, 1H), 5.20 (d,  $J = 7.9$ , 1H), 5.07 – 4.99 (m, 2H), 4.54 (ddd,  $J = 13.5$ , 8.3, 5.2, 1H), 4.18 (m, 1H), 3.88 (m, 1H), 3.75 (ddd,  $J = 11.8$ , 11.8, 5.8, 1H), 3.52 – 3.36 (m, 2H), 2.33 – 2.25 (m, 2H), 2.13 (dd,  $J = 13.3$ , 6.8, 1H), 2.01 (dd,  $J = 13.3$ , 6.8, 1H), 1.70 (s, 3H), 1.64 – 1.19 (m, 4H), 0.96 (t,  $J = 8.0$ , 9H), 0.89 (s, 9H), 0.87 (s, 9H), 0.58 (q,  $J = 8.0$ , 6H), 0.045 (s, 3H), 0.041 (s, 3H), 0.035 (s, 6H).  $^{13}\text{C}$  NMR (90 MHz,  $\text{CDCl}_3$ )  $\delta$  135.5, 135.3, 129.1, 116.5, 72.7, 71.3, 69.3, 67.5, 65.2, 44.9, 40.9, 39.8, 38.9, 26.2, 26.1, 18.6, 17.9, 7.1, 5.1, -4.2, -4.5, -5.06, -5.14.  $[\alpha]_D^{20}$  -3.3 (c 0.30,  $\text{CH}_2\text{Cl}_2$ ). IR ( $\text{CH}_2\text{Cl}_2$ ): 1471, 1081  $\text{cm}^{-1}$ . HRMS (ESI) calcd for  $\text{C}_{32}\text{H}_{67}\text{O}_4\text{Si}_3$  ( $\text{M}+\text{H}$ ) $^+$ : 599.4347, found: 599.4353.

**2-Allyl-6-[3-(2,2-dimethyl-[1,3]dioxolan-4-yl)-2-methyl-propenyl]-tetrahydro-pyran-4-ol (14)** To a solution of the silyl ether (180 mg, 0.30 mmol) in THF (4.8 mL), was added a TBAF solution (1.0 M in THF, 1.2 mL, 1.2 mmol) and stirred for 6 h. The reaction mixture was then diluted with  $\text{EtOAc}$  (20 mL) and brine (5 mL). The aqueous layer was extracted with  $\text{EtOAc}$  (2 X 10 mL). The combined organics were dried over  $\text{Na}_2\text{SO}_4$  and concentrated under reduced pressure to give the triol ( $R_f = 0.15$ ,  $\text{EtOAc}$ ) as pale yellow oil (69 mg). To a flame-dried flask under Ar, the triol was re-dissolved in  $\text{CH}_2\text{Cl}_2$  (3.0 mL), and dimethoxypropane (180  $\mu\text{L}$ , 1.5 mmol) and  $\text{TsOH}\cdot\text{H}_2\text{O}$  (6 mg, 0.03 mmol) were added. The reaction were stirred for 16 h, before quenched with a

saturated NaHCO<sub>3</sub> solution (3 mL) and then diluted with EtOAc (30 mL). The organic solution was separated, dried over Na<sub>2</sub>SO<sub>4</sub>, and concentrated under reduced pressure. Flash chromatography (silica, 40% EtOAc in hexanes) afforded the acetone (R<sub>f</sub> = 0.40, 1:1 EtOAc: hexanes) as yellow oil (72 mg, 81%). <sup>1</sup>H NMR (360 MHz, CDCl<sub>3</sub>) δ 5.78 (m, 1H), 5.20 (d, J = 8.5, 1H), 5.06 – 4.98 (m, 2H), 4.50 (m, 1H), 4.21 – 4.14 (m, 2H), 3.94 (dd, J = 8.1, 6.0, 1H), 3.84 (m, 1H), 3.49 (dd, J = 7.6, 7.6, 1H), 2.37 (dd, J = 13.7, 5.8, 1H), 2.29 (dd, J = 14.3, 7.7, 1H), 2.20 – 2.10 (m, 2H), 1.70 (s, 3H), 1.68 – 1.42 (m, 4H), 1.37 (s, 3H), 1.31 (s, 3H). <sup>13</sup>C NMR (90 MHz, CDCl<sub>3</sub>) δ 135.7, 134.9, 128.4, 117.0, 109.1, 74.8, 71.2, 69.4, 69.0, 64.9, 43.8, 40.8, 38.8, 37.9, 27.2, 26.0, 17.7. [α]<sub>D</sub><sup>20</sup> +3.6 (c 0.22, CH<sub>2</sub>Cl<sub>2</sub>). IR (CH<sub>2</sub>Cl<sub>2</sub>): 1423 cm<sup>-1</sup>. HRMS (ESI) calcd for C<sub>17</sub>H<sub>29</sub>O<sub>4</sub> (M+H)<sup>+</sup>: 297.2066, found: 297.2072.

**2-Allyl-6-[3-(2,2-dimethyl-[1,3]dioxolan-4-yl)-2-methyl-propenyl]-tetrahydro-pyran-4-one (15)**

To a solution of the alcohol (72 mg, 0.24 mmol) and NaOAc (16 mg, 0.20 mmol) in CH<sub>2</sub>Cl<sub>2</sub> (2.5 mL), was added PCC (108 mg, 0.50 mmol) and stirred for 1.5 h. The reaction mixture was then diluted with Et<sub>2</sub>O (7.5 mL) and filter through a silica plug, which was washed with Et<sub>2</sub>O (2.0 mL). The combined organics were concentrated under reduced pressure. Flash chromatography (silica, 20% EtOAc in hexanes) afforded the ketone (R<sub>f</sub> = 0.60, 1:1 EtOAc: hexanes) as pale yellow oil (53 mg, 74%). <sup>1</sup>H NMR (360 MHz, CDCl<sub>3</sub>) δ 5.79 (m, 1H), 5.30 (dd, J = 7.6, 1.3, 1H), 5.11 – 5.06 (m, 2H), 4.30 (ddd, J = 13.8, 7.9, 6.0, 1H), 4.20 (ddd, J = 12.9, 12.9, 6.5, 1H), 3.97 (dd, J = 8.0, 6.0, 1H), 3.67 (m, 1H), 3.51 (dd, J = 7.9, 7.1, 1H), 2.47 – 2.14 (m, 8H), 1.69 (s, 3H), 1.38 (s, 3H), 1.32 (s, 3H). <sup>13</sup>C NMR (90 MHz, CDCl<sub>3</sub>) δ 206.9, 136.8, 133.5, 126.8, 118.2, 109.2, 76.5, 74.6, 74.2, 69.3, 47.8, 47.2, 43.6, 40.7, 27.1, 25.9, 17.7. [α]<sub>D</sub><sup>20</sup> -12 (c 0.23, CH<sub>2</sub>Cl<sub>2</sub>). IR

(CH<sub>2</sub>Cl<sub>2</sub>): 1715, 1064 cm<sup>-1</sup>. HRMS (ESI) calcd for C<sub>17</sub>H<sub>27</sub>O<sub>4</sub> (M+H)<sup>+</sup>: 295.1909, found: 295.1915.

**2-Allyl-6-[3-(2,2-dimethyl-[1,3]dioxolan-4-yl)-2-methyl-propenyl]-4-methylene-tetrahydropyran (16)**

To a flame-dried flask under Ar, <sup>n</sup>BuLi (1.5 M solution in hexanes, 0.24 mL) was added dropwise into a solution of MePh<sub>3</sub>PBr (129 mg, 0.36 mmol) in anhydrous THF (2.1 mL) at -78°C. The reaction mixture was stirred for 15 min, before warmed to 0°C and continued to stir for 20 min. A solution of the ketone (53 mg, 0.18 mmol) in THF (2.1 mL) was then added and stirred at rt for 1.5 h. The reaction was quenched with H<sub>2</sub>O (4 mL) and the aqueous layer was extracted with ether (3 X 4 mL). The combined organic solution was dried over Na<sub>2</sub>SO<sub>4</sub> and concentrated under reduced pressure. Flash chromatography (silica, 5% EtOAc in hexanes) afforded the methylene tetrahydropyran (R<sub>f</sub> = 0.45, 20% EtOAc in hexanes) as slightly yellow oil (41 mg, 78%). <sup>1</sup>H NMR (500 MHz, CDCl<sub>3</sub>) δ 5.83 (m, 1H), 5.30 (dd, J = 7.5, 1.0, 1H), 5.06 (m, 2H), 4.73 (dd, J = 1.5, 1.5, 2H), 4.22 (ddd, J = 13.2, 6.1, 6.1, 1H), 4.01 (m, 1H), 4.00 (dd, J = 7.6, 5.7, 1H), 3.54 (dd, J = 7.5, 7.5, 1H), 3.36 (m, 1H), 2.41 (dd, J = 14.0, 6.3, 2H), 2.27-2.12 (m, 2H), 2.03 (ddd, J = 11.5, 11.5, 1.2, 1H), 1.92 (ddd, J = 11.5, 11.5, 1.2, 1H), 1.72 (d, J = 1.0, 3H), 1.41 (s, 3H), 1.35 (s, 3H). <sup>13</sup>C NMR (90 MHz, CDCl<sub>3</sub>) δ 144.6, 135.7, 134.8, 128.4, 117.1, 109.1, 108.9, 78.0, 75.7, 74.8, 69.5, 43.8, 41.0, 40.2, 27.2, 26.0, 17.7. HRMS (EI) calcd for C<sub>18</sub>H<sub>28</sub>O<sub>3</sub> (M<sup>+</sup>), 292.2038, found 292.2031.

**7-Hydroxy-5-methyl-hepta-2,4-dienoic acid ethyl ester (18)** To a flame-dried flask under Ar, a LiHMDS solution (1.0 M in THF, 34.5 mL, 34.5 mmol) was added dropwise into a solution of triethyl phosphonoacetate (6.91 mL, 34.5 mmol) in THF (34 mL) and stirred for 15 min. at 0°C. A solution of the enal (3.95 g, 17.2 mmol) in THF (52 mL) was

then added. The reaction mixture was warmed to rt and stirred for 1 h, before diluted with Et<sub>2</sub>O (100 mL) and quenched with H<sub>2</sub>O (30 mL). The aqueous solution was extracted with Et<sub>2</sub>O (30 mL), and the combined organics were dried over Na<sub>2</sub>SO<sub>4</sub> and concentrated under reduced pressure. Flash chromatography (silica, 5% EtOAc in hexanes) afforded the dienoate (*R*<sub>f</sub> = 0.40, 10% EtOAc in hexanes) as colorless oil (5.03 g, 98%). <sup>1</sup>H NMR (360 MHz, CDCl<sub>3</sub>) δ 7.54 (dd, *J* = 15.3, 11.8, 1H), 6.05 (d, *J* = 11.6, 1H), 5.75 (d, *J* = 15.1, 1H), 4.19 (q, *J* = 7.5, 2H), 3.70 (t, *J* = 6.5, 2H), 2.50 (t, *J* = 6.6, 2H), 1.90 (s, 3H), 1.29 (t, *J* = 7.4, 3H), 0.87 (s, 9H), 0.04 (s, 6H). <sup>13</sup>C NMR (90 MHz, CDCl<sub>3</sub>) δ 167.7, 147.1, 141.1, 125.7, 119.5, 61.9, 60.2, 39.2, 36.7, 26.2, 25.2, 14.5, -5.1. IR (CH<sub>2</sub>Cl<sub>2</sub>): 1704, 1637, 1156, 1101 cm<sup>-1</sup>. HRMS (ESI) calcd for C<sub>16</sub>H<sub>31</sub>O<sub>3</sub>Si (M+H)<sup>+</sup>: 299.2042, found: 299.2047.

To a solution of the silyl ether (298 mg, 1.0 mmol) in THF (10 mL), was added a Py•HF solution (65% in Py, 0.3 mL, ~10.0 mmol) and stirred for 4 h. The reaction mixture was diluted with Et<sub>2</sub>O (30 mL), and quenched with a saturated NaHCO<sub>3</sub> solution (10 mL) along with solid NaHCO<sub>3</sub> until no gas was evolved. The aqueous layer was extracted with EtOAc (10 mL), and the combined organics were dried over Na<sub>2</sub>SO<sub>4</sub>. Evaporation of solvents afforded the alcohol (*R*<sub>f</sub> = 0.30, 1:1 EtOAc: hexanes) as pale yellow oil (169 mg, 92%) without further purification. <sup>1</sup>H NMR (360 MHz, CDCl<sub>3</sub>) δ 7.54 (dd, *J* = 15.1, 11.7, 1H), 6.09 (d, *J* = 11.7, 1H), 5.77 (d, *J* = 15.5, 1H), 4.17 (q, *J* = 7.2, 2H), 3.72 (t, *J* = 6.7, 2H), 2.55 (t, *J* = 6.7, 2H), 1.90 (s, 3H), 1.27 (t, *J* = 7.2, 3H). <sup>13</sup>C NMR (90 MHz, CDCl<sub>3</sub>) δ 167.9, 146.4, 140.5, 126.1, 119.7, 60.9, 60.4, 36.2, 24.7, 14.5. IR (CH<sub>2</sub>Cl<sub>2</sub>): 1704, 1637, 1154 cm<sup>-1</sup>. HRMS (ESI) calcd for C<sub>10</sub>H<sub>17</sub>O<sub>3</sub> (M+H)<sup>+</sup>: 185.1178, found: 185.1168.

**7-Hydroxy-5-methyl-nona-2,4,8-trienoic acid ethyl ester (19)** A solution of Dess-Martin periodinane (15% in CH<sub>2</sub>Cl<sub>2</sub>, 17 mL, 8.14 mmol) was added into the alcohol (1.00 g, 5.43 mmol) at 0°C. The reaction mixture was warmed to rt and kept stirring for 1 h, before quenched with isopropanol (6 mL) and stirred for 5 more minutes. The mixture was filtered through silica, which was then eluted with EtOAc. The combined organics were concentrated under reduced pressure. Flash chromatography (silica, 30% EtOAc in hexanes) afforded the aldehyde (*R<sub>f</sub>* = 0.35, 30% EtOAc in hexanes) as pale yellow oil (602 mg, 61%). <sup>1</sup>H NMR (360 MHz, CDCl<sub>3</sub>) δ 9.59 (t, *J* = 1.8, 1H), 7.39 (dd, *J* = 15.1, 11.7, 1H), 6.21 (d, *J* = 11.7, 1H), 5.83 (d, *J* = 15.1, 1H), 4.16 (q, *J* = 7.2, 2H), 3.40 (s, 2H), 1.89 (s, 3H), 1.25 (t, *J* = 7.2, 3H). <sup>13</sup>C NMR (90 MHz, CDCl<sub>3</sub>) δ 197.5, 167.2, 139.2, 139.0, 127.8, 121.4, 60.5, 47.9, 25.3, 14.4. IR (CH<sub>2</sub>Cl<sub>2</sub>): 1718, 1706, 1638, 1158 cm<sup>-1</sup>. HRMS (ESI) calcd for C<sub>10</sub>H<sub>15</sub>O<sub>3</sub> (*M*+H)<sup>+</sup>: 183.1021, found: 183.1036.

To a flame-dried flask under Ar, a vinylMgBr solution (1.0 M in THF, 0.93 mL, 0.93 mmol) was added dropwise into a solution of the aldehyde (67 mg, 0.37 mmol) in THF (2.8 mL) at -78°C. The reaction mixture was stirred for 2 h, before quenched with a saturated NH<sub>4</sub>Cl solution (0.9 mL), warmed to rt, and diluted with EtOAc (20 mL). The organic solution was dried over Na<sub>2</sub>SO<sub>4</sub> and concentrated under reduced pressure. Flash chromatography (silica, 30% EtOAc in hexanes) afforded the allylic alcohol (*R<sub>f</sub>* = 0.50, 1:1 EtOAc: hexanes) as brown oil (38 mg, 49%). <sup>1</sup>H NMR (360 MHz, CDCl<sub>3</sub>) δ 7.53 (dd, *J* = 15.1, 11.7, 1H), 6.11 (d, *J* = 11.7, 1H), 5.88 (m, 1H), 5.77 (d, *J* = 15.1, 1H), 5.25 (d, *J* = 17.2, 1H), 5.11 (d, *J* = 10.4, 1H), 4.17 (g, *J* = 7.1, 2H), 2.62 (dd, *J* = 13.4, 8.2, 1H), 2.41 (dd, *J* = 13.4, 5.4, 1H), 1.91 (s, 3H), 1.27 (t, *J* = 7.1, 3H). <sup>13</sup>C NMR (90 MHz, CDCl<sub>3</sub>) δ 167.7, 145.7, 140.5, 140.3, 126.7, 120.0, 115.3, 71.6, 60.3, 40.6, 25.3, 14.5. IR (CH<sub>2</sub>Cl<sub>2</sub>):

1707, 1640, 1632, 1157  $\text{cm}^{-1}$ . HRMS (ESI) calcd for  $\text{C}_{12}\text{H}_{19}\text{O}_3$  ( $\text{M}+\text{H}$ ) $^{+}$ : 211.1334, found: 211.1334.

**7-(tert-Butyl-dimethyl-silanyloxy)-5-methyl-nona-2,4,8-trienoic acid (4)** In a flame-dried flask under Ar, a solution of the allylic alcohol (195 mg, 0.93 mmol), TBSCl (280 mg, 1.86 mmol) and Im (190 mg, 2.79 mmol) in DMF (2.0 mL) was kept stirring for 20 h, before diluted with  $\text{Et}_2\text{O}$  (40 mL) and quenched with  $\text{H}_2\text{O}$  (10 mL). The organic solution was dried over  $\text{Na}_2\text{SO}_4$  and concentrated under reduced pressure. Flash chromatography (silica, 10% EtOAc in hexanes) afforded the TBS ether ( $R_f$  = 0.32, 10% EtOAc in hexanes) as pale yellow oil (254 mg, 85%).  $^1\text{H}$  NMR (360 MHz,  $\text{CDCl}_3$ )  $\delta$  7.53 (dd,  $J$  = 15.1, 11.6, 1H), 6.05 (d,  $J$  = 11.6, 1H), 5.83 (dd,  $J$  = 10.4, 6.1, 1H), 5.78 (dd,  $J$  = 10.4, 6.6, 1H), 5.75 (d,  $J$  = 15.3, 1H), 5.17 (ddd,  $J$  = 17.1, 1.4, 1.4, 1H), 5.04 (ddd,  $J$  = 10.3, 1.3, 1.3, 1H), 4.22 (m, 1H), 4.19 (q,  $J$  = 7.1, 2H), 2.58 (dd,  $J$  = 13.2, 7.7, 1H), 2.34 (dd,  $J$  = 13.2, 5.4, 1H), 1.90 (s, 3H), 1.28 (t,  $J$  = 7.1, 3H), 0.86 (s, 9H), 0.01 (s, 6H).  $^{13}\text{C}$  NMR (90 MHz,  $\text{CDCl}_3$ )  $\delta$  167.6, 146.2, 141.1, 141.0, 126.1, 119.3, 114.1, 73.0, 60.1, 41.7, 25.9, 25.7, 18.3, 14.4, -2.9, -4.4. IR ( $\text{CH}_2\text{Cl}_2$ ): 1708, 1631  $\text{cm}^{-1}$ . HRMS (ESI) calcd for  $\text{C}_{18}\text{H}_{33}\text{O}_3\text{Si}$  ( $\text{M}+\text{H}$ ) $^{+}$ : 325.2199, found: 325.2205.

To a solution of the ester (241 mg, 0.74 mmol) in EtOH (3.7 mL), was added dropwise an aqueous NaOH solution (1.0 M, 1.85 mL) at  $0^\circ\text{C}$ . The reaction mixture was then warmed to rt and stirred for 20 h before an aqueous HCl solution was added (1.0 M, 1.85 mL). EtOAc (20 mL) was added and allowed to partition. The aqueous layer was extracted with EtOAc (2 X 5 mL) and the organics were combined, dried over  $\text{Na}_2\text{SO}_4$ , and solvents were removed under reduced pressure. The residue was re-dissolved in toluene (4 mL) and then rotavapped to afford the acid ( $R_f$  = 0.56, EtOAc) as pale yellow

viscous oil (208 mg, 95%). This material was used without further purification. This is a known compound. {Hoye, T. R.; Hu, M. *J. Am. Chem. Soc.* **2003**, *125*, 9576.}

**5-(6-Allyl-4-methylene-tetrahydro-pyran-2-yl)-1-(tert-butyl-dimethyl-silanyloxy)-4-methyl-pent-4-en-2-ol (3)** To a solution of the acetonide (29 mg, 0.1 mmol) in EtOH (0.33 mL) and CH<sub>2</sub>Cl<sub>2</sub> (0.33 mL) at 0°C, was added TFA (0.33 mL) dropwise and stirred for 10 min. The solvents were removed under reduced pressure, and the residue was co-evaporated with PhMe (2 X 2 mL) to remove TFA to afford the diol. To a flame-dried flask under Ar, Et<sub>3</sub>N (56 µL, 0.4 mmol) was added dropwise into a solution of the diol, TBSCl (38 mg, 0.25 mmol), DMAP (2 mg, 16 µmol) in CH<sub>2</sub>Cl<sub>2</sub> (1.0 mL) at 0°C. The reaction mixture was warmed to rt and stirred for 1.5 h, before quenched with H<sub>2</sub>O (0.5 mL). The aqueous layer was extracted with Et<sub>2</sub>O (2 X 5 mL), and the combined organic solution was dried over Na<sub>2</sub>SO<sub>4</sub> and concentrated under reduced pressure. Flash chromatography (silica, 20% EtOAc in hexanes) afforded the alcohol (R<sub>f</sub> = 0.35, 20% EtOAc in hexanes) as colorless oil (35 mg, 97%). <sup>1</sup>H NMR (360 MHz, CDCl<sub>3</sub>) δ 5.83 (m, 1H), 5.30 (d, J = 7.8, 1H), 5.10 – 5.03 (m, 2H), 4.73 (s, 2H), 4.01 (ddd, J = 10.8, 7.8, 2.7, 1H), 3.79 (dddd, J = 13.5, 10.6, 6.7, 3.8, 1H), 3.59 (dd, J = 10.0, 3.8, 1H), 3.44 (dd, J = 10.0, 6.6, 1H), 3.36 (m, 1H), 2.43 – 2.14 (m, 6H), 2.04 (dd, J = 11.3, 11.3, 1H), 1.92 (dd, J = 11.3, 11.3, 1H), 1.72 (d, J = 1.2, 3H), 0.90 (s, 9H), 0.06 (s, 6H). <sup>13</sup>C NMR (90 MHz, CDCl<sub>3</sub>) δ 144.6, 136.0, 134.7, 128.6, 117.3, 108.8, 77.9, 75.7, 70.1, 66.7, 43.4, 40.8, 40.1, 26.1, 18.4, 17.4, -5.2.

**7-(tert-Butyl-dimethyl-silanyloxy)-5-methyl-nona-2,4,8-trienoic acid 4-(6-allyl-4-methylene-tetrahydro-pyran-2-yl)-1-(tert-butyl-dimethyl-silanyloxymethyl-3-methyl-but-3-enyl ester (20)** To a flame-dried flask under Ar, trichlorobenzoyl chloride

(20  $\mu$ L, 0.13 mmol) was added dropwise into a solution of the acid (25 mg, 0.084 mmol) and Et<sub>3</sub>N (24  $\mu$ L, 0.17 mmol) in PhMe (0.8 mL). The reaction mixture was stirred for 1 h, before was added a solution of the alcohol (14 mg, 0.038 mmol) and DMAP (6 mg, 0.046 mmol) in PhMe (0.4 mL). The resultant suspension was stirred for 1 h, and then a saturated NaHCO<sub>3</sub> solution (1.2 mL) was added followed by Et<sub>2</sub>O (20 mL). The aqueous layer was extracted with Et<sub>2</sub>O (5 mL), and the combined organic solution was dried over Na<sub>2</sub>SO<sub>4</sub> and concentrated under reduced pressure. Flash chromatography (silica, 5% EtOAc in hexanes) afforded the ester ( $R_f$  = 0.50, 0.55, 20% EtOAc in hexanes) as yellow oil (28 mg, yield:100%, dr: 3:1). Major diastereomer: <sup>1</sup>H NMR (360 MHz, CDCl<sub>3</sub>)  $\delta$  7.54 (dd,  $J$  = 15.7, 11.7, 1H), 6.06 (d,  $J$  = 11.7, 1H), 5.88 – 5.75 (m, 2H), 5.76 (d,  $J$  = 15.5, 1H), 5.30 (d,  $J$  = 7.9, 1H), 5.17 (d,  $J$  = 17.1, 1H), 5.10 – 5.01 (m, 4 H), 4.72 (s, 2H), 4.24 (dd,  $J$  = 12.3, 5.8, 1H), 3.98 (m, 1H), 3.66 (m, 2H), 3.34 (m, 1H), 2.36 – 1.83 (m, 10H), 1.90 (s, 3H), 1.73 (s, 3H), 0.88 (s, 9H), 0.86 (s, 9H), 0.04 (s, 3H), 0.03 (s, 3H), 0.00 (s, 6H). <sup>13</sup>C NMR (90 MHz, CDCl<sub>3</sub>) The carbon spectrum is too complicated to interpret properly.  $[\alpha]_D^{20}$  +28 (c 0.05, CH<sub>2</sub>Cl<sub>2</sub>). HRMS (ESI) calcd for C<sub>37</sub>H<sub>65</sub>O<sub>5</sub>Si<sub>2</sub> (M+H)<sup>+</sup>: 645.4371, found: 645.4370.

**13-Hydroxy-5-hydroxymethyl-3,11-dimethyl-19-methylene-6,21-dioxa-**

**bicyclo[15.3.1]heneic osa-2,8,10,14-tetraen-7-one (21)** To a solution of the bis-TBS ether (6.4 mg, 10  $\mu$ mol) in MeOH (200  $\mu$ L) and CH<sub>2</sub>Cl<sub>2</sub> (50  $\mu$ L), was added an aqueous HCl solution (1.0 M, 20  $\mu$ L) and stirred for 4.5 h. A saturated NaHCO<sub>3</sub> solution (0.1 mL) was then added, and the aqueous solution was extracted with EtOAc (2 X 3 mL). The organics were combined, dried over Na<sub>2</sub>SO<sub>4</sub>, and solvents were removed under reduced pressure. Flash chromatography (silica, 1:1 EtOAc: hexanes) afforded the diol ( $R_f$  = 0.31,



1:1 EtOAc: hexanes) as a slightly yellow solid (3.3 mg, yield: 80%, dr: 3:1).major diastereomer:  $^1\text{H}$  NMR (360 MHz,  $\text{CDCl}_3$ )  $\delta$  7.59 (m, 1H), 6.14 (d,  $J = 11.7$ , 1H), 5.94-5.76 (m, 3H), 5.32 (d,  $J = 8.0$ , 1H), 5.27 (ddd,  $J = 17.1$ , 1.2, 1.2, 1H), 5.16-5.02 (m, 4H), 4.72 (s, 2H), 4.29 (m, 1H), 3.98 (m, 1H), 3.74 (dd,  $J = 12.1$ , 3.1, 1H), 3.64 (dd,  $J = 12.1$ , 6.4, 1H), 3.34 (m, 1H), 2.64 (m, 1H), 2.45-1.87 (m, 9H), 1.94 (s, 3H), 1.74 (s, 3H).  $^{13}\text{C}$  NMR (90 MHz,  $\text{CDCl}_3$ )  $\delta$  167.9, 146.4, 144.5, 141.5, 140.3, 134.7, 134.5, 129.5, 126.7, 119.5, 117.1, 115.5, 109.0, 77.9, 75.7, 73.9, 71.6, 64.6, 40.9, 40.8, 40.1, 29.9, 25.4, 17.4.  $[\alpha]_D^{20} +11$  (c 0.07,  $\text{CH}_2\text{Cl}_2$ ). HRMS (ESI) calcd for  $\text{C}_{25}\text{H}_{37}\text{O}_5$  ( $\text{M}+\text{H}$ ) $^+$ : 417.2641, found: 417.2644.

To a flame-dried flask under Ar, the Grubbs' second generation catalyst (0.8 mg, 1.0  $\mu\text{mol}$ ) was added into a stirring solution of the hexaene (4.1 mg, 10  $\mu\text{mol}$ ) in  $\text{CH}_2\text{Cl}_2$  (10 mL), and kept stirring for 1 h. The solution was concentrated under reduced pressure. Flash chromatography (silica, 3:2 EtOAc: hexanes) afforded the pentaene ( $R_f = 0.32$ , 3:2 EtOAc: hexanes) as a colorless solid (3.6 mg, yield: 93%, dr: 1:1).  $^1\text{H}$  NMR (360 MHz,  $\text{CDCl}_3$ )  $\delta$  7.58 (dd,  $J = 15.1$ , 11.6)/7.45 (dd,  $J = 15.1$ , 11.5, 1H)\*, 6.06 (d,  $J = 11.5$ , 1H), 5.81 (d,  $J = 15.1$ )/5.76(d,  $J = 15.1$ , 1H)\*, 5.76 – 5.56 (m, 2H), 5.29 (d,  $J = 7.0$ )/5.23 (d,  $J = 8.0$ , 1H)\*, 5.18 (m, 1H), 4.73 (s)/4.71 (s, 2H)\*, 4.35 (dd,  $J = 12.0$ , 7.1)/4.23 (dd,  $J = 12.2$ , 5.5, 1H)\*, 3.94 (ddd,  $J = 17.6$ , 8.4, 2.7, 1H), 3.72 (m, 2H), 3.32 (ddd,  $J = 11.1$ , 11.1, 2.3, 1H), 2.82 (dd,  $J = 13.4$ , 8.3,)\*/2.56 – 1.62 (m, 10H), 1.99 (s)/1.88 (s, 3H)\*, 1.72 (s)/1.69 (s, 3H)\*. \*: due to diastereomers.  $^{13}\text{C}$  NMR (90 MHz,  $\text{CDCl}_3$ ) The carbon spectrum is too complicated to interpret properly. HRMS (ESI) calcd for  $\text{C}_{23}\text{H}_{33}\text{O}_5$  ( $\text{M}+\text{H}$ ) $^+$ : 389.2328, found: 389.2306.

**(-)-Dactylolide (2)** To a solution of the diol (3.6 mg, 9.3  $\mu\text{mol}$ ) in  $\text{CH}_2\text{Cl}_2$  (100  $\mu\text{L}$ ), was added dropwise a Dess-Martin solution (15% in  $\text{CH}_2\text{Cl}_2$ , 77  $\mu\text{L}$ , 37.2  $\mu\text{mol}$ ) at  $0^\circ\text{C}$  and then warmed to rt. The reaction mixture was stirred for 0.5 h before diluted with  $\text{CH}_2\text{Cl}_2$  (1.0 mL) and  $\text{Et}_2\text{O}$  (2.0 mL). Pyridine (5  $\mu\text{L}$ , 91  $\mu\text{mol}$ ) was added and the whole solution was filter through a plug of celite. Solvents were removed under reduced pressure. Flash chromatography (silica, 1:1 EtOAc: hexanes) afforded dactylolide ( $R_f$  = 0.46, 3:2 EtOAc: hexanes) as a colorless solid (3.2 mg, 90%).  $^1\text{H}$  NMR (500 MHz,  $\text{CDCl}_3$ )  $\delta$  9.67 (s, 1H), 7.63 (dd,  $J$  = 15.1, 11.6, 1H), 6.85 (ddd,  $J$  = 16.1, 8.6, 5.9, 1H), 6.15 (d,  $J$  = 11.6, 1H), 6.00 (d,  $J$  = 16.2, 1H), 5.96 (d,  $J$  = 15.1, 1H), 5.32 (dd,  $J$  = 11.4, 2.4, 1H), 5.24 (d,  $J$  = 8.0, 1H), 4.75 (s, 2H), 3.97 (ddd,  $J$  = 11.1, 8.1, 2.5, 1H), 3.95 (d,  $J$  = 14.3, 1H), 3.32 (dddd,  $J$  = 11.4, 9.1, 2.5, 2.5, 1H), 3.23 (d,  $J$  = 14.3, 1H), 2.54 (d,  $J$  = 14.0, 1H), 2.39-2.27 (m, 3H), 2.17 (ddd,  $J$  = 13.2, 1.6, 1.6, 1H), 2.11 (ddd,  $J$  = 13.0, 1.6, 1.6, 1H), 1.96 (m, 2H), 1.86 (s, 3H), 1.72 (s, 3H).  $^{13}\text{C}$  NMR (90 MHz,  $\text{CDCl}_3$ )  $\delta$  199.3, 197.6, 166.5, 146.2, 144.2, 140.6, 131.7, 131.1, 130.7, 125.8, 120.0, 109.5, 76.7, 75.9, 75.5, 45.1, 41.0, 40.6, 39.94, 39.90, 24.3, 16.3.  $[\alpha]_D^{20}$  = -136 (c 1.2, MeOH). IR ( $\text{CH}_2\text{Cl}_2$ ): 1722, 1703, 1668, 1638, 1283  $\text{cm}^{-1}$ . HRMS (ESI) calcd for  $\text{C}_{23}\text{H}_{29}\text{O}_5$  ( $\text{M}+\text{H}$ ) $^+$ : 385.2015, found: 385.2023.
